# Supplementary material
Source: PubMed Central journal article supplement (PMC11253802)
Supplement: JSLHR-67-2297-s001.pdf [file JSLHR-67-2297-s001.pdf]

**Supplemental Material S1.** Cross-linguistic autism studies published in English employing sentence repetition and sentence production tasks.

| Study                                      | Race/Ethnicity                                            | Language | N                 | Dx     | ASD age      | LI Definition |                                                    | ASD NVIQ                 | Task                   |       | Group Comparisons                                                      | p                      | g                          |
|--------------------------------------------|-----------------------------------------------------------|----------|-------------------|--------|--------------|---------------|----------------------------------------------------|--------------------------|------------------------|-------|------------------------------------------------------------------------|------------------------|----------------------------|
|                                            |                                                           |          |                   |        |              | NVIQ          | Language                                           |                          | Measure                | SR SP |                                                                        |                        |                            |
| <b>ASD &lt; TD</b>                         |                                                           |          |                   |        |              |               |                                                    |                          |                        |       |                                                                        |                        |                            |
| Alhassan & Marinis (2021)                  | NR                                                        | Arabic   | 10 ASD<br>42 TD   | NR     | 5.83         | -             | Arabic PPVT $\leq -1$<br>SD                        | 14.6 (4.89)              | Saudi-SRT %            | x     | <b>.23 (.1) &lt; .36 (.2)</b>                                          | <b>.012</b>            | <b>0.62</b>                |
| Arutiunian et al. (2022)                   | NR                                                        | Russian  | 60 ASD<br>25 TD   | ICD-10 | 9.11         | -             | -                                                  | 83.1 (20.5)              | KORABLIK %             | x     | <b>0.7 (0.4) &lt; 1.0 (.1)</b><br>x <b>0.6 (0.4) &lt; 1.0 (0.1)</b>    | <b>&lt;.001</b>        | <b>0.9</b><br><b>1.02</b>  |
| Brynskov et al. (2017)                     | NR                                                        | Danish   | 21 ASD<br>21 TD   | ICD-10 | 4-6          | -             | -                                                  | 106 (19)                 | CELF-P2 raw score      | x     | <b>21.4 (11.0) &lt; 29.8 (4.2)</b>                                     | <b>.001</b>            | <b>0.99</b>                |
| Landa & Goldberg (2005)                    |                                                           | English  | 19 "HFA"<br>19 TD | NR     | 11.01        | $\geq 80$     | -                                                  | 104.6 (13.5)             | CELF-R SS              | x     | <b>7.2 (2.7) &lt; 9.8 (3.4)</b>                                        | <b>&lt;.01</b>         | <b>0.82</b>                |
| Larson et al. (2022)                       | ASD: 34 white, 1 Latino<br>TD: 31 white, 2<br>multiracial | English  | 34 ASD<br>34 TD   | NR     | 13.3         | $> 77$        | CELF-4 CLS $\leq -1.25$ SD or RS SS $\leq -1$ SD   | 111 (14)                 | CELF-4 SS              | x     | <b>9.4 (2.9) &lt; 12.0 (1.8)</b>                                       | <b>&lt;.001</b>        | <b>1.04</b>                |
| Sukenik & Friedmann (2018)                 | NR                                                        | Hebrew   | 18 ASD<br>90 TD   | DSM-IV | 13.33        | $> 75$        | -                                                  | NR                       | PETEL                  | x     | <b>NR</b>                                                              | <b>&lt;.0001</b>       | -                          |
| Tyson et al. (2014)                        | NR                                                        | English  | 44 "HFA"<br>34 TD | NR     | 13.9         | $\geq 77$     | -                                                  | 110.2 (12.8)             | CELF-4 SS              | x     | <b>9.4 (3.0) &lt; 12.0 (1.8)</b><br>x <b>9.7 (3.2) &lt; 13.1 (1.3)</b> | <b>&lt;.01</b>         | <b>0.99</b><br><b>1.34</b> |
| <b>ASD = TD</b>                            |                                                           |          |                   |        |              |               |                                                    |                          |                        |       |                                                                        |                        |                            |
| Harper-Hill et al. (2013)                  | NR                                                        | English  | 20 PDD<br>15 TD   | ICD-10 | 11.58        | -             | -                                                  | 99.2 (18.0)              | CELF-4 SS              | x     | 9.2 (3.8) = 10.4 (2.2)<br>x 9.5 (4.4) = 11.5 (1.8)                     | .230<br>.289           | 0.4<br>0.56                |
| Manenti et al. (2023)*                     | NR                                                        | French   | 34 ASD<br>41 TD   | ICD-11 | 31           | -             | $\leq -1.25$ SD of the TD sample M on LITMUS-SR-FR | 99.1 (22.3)              | LITMUS-French %        | x     | 73 (34.9) = 89.1 (9.4)                                                 | .466                   | 0.66                       |
| <b>Mixed: ASD = TD &amp; ASD &lt; TD</b>   |                                                           |          |                   |        |              |               |                                                    |                          |                        |       |                                                                        |                        |                            |
| Georgiou & Spanoudis (2021) "Greek native" |                                                           | Greek    | 16 ASD<br>35 TD   | DSM-5  | 9.1          | $\geq 75$     | $\leq -1.25$ SD on $\geq 2$ EREL subtests          | 92.38 (10.6)             | EREL raw score         | x     | 39.1 (17.5) = 45.9 (12.4)<br>x <b>22.3 (11.7) &lt; 29.5 (10.7)</b>     | .500<br><b>&lt;.01</b> | 0.48<br><b>0.65</b>        |
| <b>ALI = TD</b>                            |                                                           |          |                   |        |              |               |                                                    |                          |                        |       |                                                                        |                        |                            |
| Riches et al. (2010)                       | NR                                                        | English  | 16 ALI<br>17 TD   | ICD-10 | 14.67        | $\geq 80$     | CELF-3 core language $\leq -1.5$ SD                | 11.6 (2.4)               | CELF-3 raw score       | x     | 21.2 (4.7) = 28.2 (1.5)                                                | .538                   | 1.98                       |
| <b>ALI &lt; ASD</b>                        |                                                           |          |                   |        |              |               |                                                    |                          |                        |       |                                                                        |                        |                            |
| Alhassan & Marinis (2021)                  | NR                                                        | Arabic   | 10 ALI<br>10 ASD  | NR     | 6.04<br>5.83 | -             | Arabic PPVT $\leq -1$<br>SD                        | 11.4 (2.2)<br>14.6 (1.8) | Saudi-SRT %<br>correct | x     | <b>.10 (.09) &lt; .23 (.08)</b>                                        | <b>.010</b>            | <b>1.53</b>                |

| <b>ALI = ASD</b>                           |    |         |                                     |        |              |     |                                                                                                                                                          |                              |                       |     |                            |                 |      |
|--------------------------------------------|----|---------|-------------------------------------|--------|--------------|-----|----------------------------------------------------------------------------------------------------------------------------------------------------------|------------------------------|-----------------------|-----|----------------------------|-----------------|------|
| Georgiou & Spanoudis (2021) "Greek native" |    | Greek   | 24 ALI<br>16 ASD                    | DSM-5  | 6.4<br>9.1   | ≥75 | ≤ -1.25 SD on ≥2<br>EREL subtests                                                                                                                        | 86.9 (5.4)<br>92.4 (10.6)    | EREL raw score        | x   | 18.3 (10.3) = 39.1 (17.5)  | .070            | 1.45 |
|                                            |    |         |                                     |        |              |     |                                                                                                                                                          |                              |                       | x   | 9 (6.5) = 22.3 (11.7)      | .980            | 1.46 |
| Whitehouse et al. (2008)                   | NR | English | 18 ALI<br>18 ASD                    | DSM-IV | 10.9<br>10.7 | ≥80 | <10th centile on<br>≥2: TROG, ERRNI<br>Beach Story,<br>TOWRE sight<br>word & phonemic<br>decoding, CCC-2,<br>NEPSY NWR,<br>NEPSY memory<br>for sentences | 100.3 (11.7)<br>110.3 (14.9) | NEPSY SS              | x   | 8.4 (3.4) = 9.8 (2.7)      | NR              | 0.46 |
| <b>Group Differences Unknown</b>           |    |         |                                     |        |              |     |                                                                                                                                                          |                              |                       |     |                            |                 |      |
| Botting & Conti-Ramsden (2003)             | NR | English | 13 AD                               | DSM-IV | 10.8         | >70 | EVT < 10th centile<br>& TROG < 50th<br>centile                                                                                                           | 90 (76-107)                  | CELF-R median %       | x   | 5 (1-9)                    | NR              | -    |
| McGregor et al. (2012)                     | NR | English | 12 ALI<br>21 ASD                    | NR     | 10.97        | ≥85 | CELF-4 SR & FS<br>scaled scores ≤ -1<br>SD                                                                                                               | 101 (12.1)<br>113 (12.3)     | CELF-4 M raw<br>score | x x | 75.5 (11.0)<br>137.5 (8.3) | NR              | -    |
| Silleresi et al. (2020)                    | NR | French  | 16 ALI<br>27 ASD                    | DSM-5  | 8.92         | ≥80 | LITMUS SR &<br>NWR < 77%                                                                                                                                 | 92.3 (15.3)                  | LITMUS-French %       | x   | 31.1 (19.9)<br>87.9 (11.2) | NR              | -    |
| Manenti et al. (2023)*                     | NR | French  | 24 ASD-<br>Normal<br>10 ASD-<br>Low | ICD-11 | 31           | -   | ≤ -1.25 SD on<br>LITMUS-SR-FR                                                                                                                            | 99.1 (22.3)                  | LITMUS-French %       | x   | -                          | <b>&lt;.001</b> | -    |

*Note.* Significant differences in bolded text. Dx = diagnosis. LI = language impairment. SR = Sentence repetition. SP = sentence production. ASD = autism spectrum disorder. NVIQ = nonverbal intelligence quotient. *g* = Hedge's *g*. TD = typically developing. ICD-10 = International Classification. "HFA" = "high functioning autism," as reported in original study. DSM-IV = Diagnostic and statistical manual of mental disorders (DSM)-4th ed. (American Psychiatric Association [APA], 1994). DSM-5 = DSM-5th ed. (APA, 2013). KORABLIK = Russian Child Language Assessment Battery (Lopukhina et al., 2019). CELF-P:2 = Clinical Evaluation of Language Fundamentals (CELF)-Preschool, 2nd Ed (Semel et al., 2004). Raw = raw score. CELF-R = CELF-Revised (Semel et al., 1987). SS = scaled score. CELF=4 = CELF-4th Ed. (Semel et al., 2003). CLS = core language score. PETEL = PETEL: A Sentence Repetition Test (Friedmann, 2000). EREL = Expressive and Receptive Language Evaluation (Spanoudis & Pathiti, 2014). ALI = autism plus language impairment. CELF=3 = CELF-3rd Ed (Semel et al., 1995). AD = autistic disorder. TROG = Test for Reception of Grammar (Bishop, 2005). ERRNI = Expression, Reception, and Recall of Narrative Instrument (Bishop, 2004). TOWRE = Test of Word Reading Efficiency (Torgesen et al., 1999). CCC-2 = Children's Communication Checklist-2nd Ed. (Bishop, 2003). NEPSY = NEPSY: A developmental neuropsychological assessment (Korkman et al., 1998). NWR = nonword repetition test. EVT = Expressive Vocabulary Test (Williams, 1997). LITMUS = The LITMUS-Sentence Repetition-French (Prévost et al., 2012). Arutiunian et al. (2022) measured NVIQ using Raven's Colored Progressive Matrices (Raven, 2000, 2004) in ASD and Kaufman Assessment Battery for Children, K-ABC II (Kaufman & Kaufman, 2004) and Wechsler Intelligence Scale for Children-Third Edition (WISC-III, 1991). In Larson et al. (2022), Landa & Goldberg (2005), and Tyson et al. (2014), NVIQ cutoff was also for FSIQ and VIQ. Riches et al. (2010) reported Wechsler Intelligence Scale for Children - III (WISC-III; Wechsler, 1992) Block Design and Picture Arrangement mean. NR = not reported. - = not possible to calculate.

\*Manenti et al. (2023) reported 5 ASD participants reached the stop criterion (i.e., did not answer or answered in a fragmented way, such as by producing only one word or one phrase, for a whole block) and were excluded from analyses. Also, accuracy lower in ASD-Low than ASD-Normal ( $U(34) = 0, p < .001, r = -0.784$ ), but means and *SD* not reported.
